# Supplementary material
Source: publisher site journal article supplement (https://www.dovepress.com/article/350660)
Supplement: Supplementary file 1 [file get_supplementary_file.php]

**Supplementary material**

**Supplementary Table S1:** Summary results of Graded Response Method IRT analysis properties

| First Author | year | FCV 1 | | | | | FCV 2 | | | | | FCV 3 | | | | | FCV 4 | | | | | FCV 5 | | | | | FCV 6 | | | | | FCV 7 | | | | |
| --- | --- | --- | --- | --- | --- | --- | --- | --- | --- | --- | --- | --- | --- | --- | --- | --- | --- | --- | --- | --- | --- | --- | --- | --- | --- | --- | --- | --- | --- | --- | --- | --- | --- | --- | --- | --- |
| a | b1 | b2 | b3 | b4 | a | b1 | b2 | b3 | b4 | a | b1 | b2 | b3 | b4 | a | b1 | b2 | b3 | b4 | a | b1 | b2 | b3 | b4 | a | b1 | b2 | b3 | b4 | a | b1 | b2 | b3 | b4 |
| Al-Shannaq 36 | 2021 | 2.33 | −1.14 | −0.09 | 0.55 | 1.94 | 1.87 | −1.38 | −0.33 | 0.18 | 2.13 | 2.82 | −0.20 | 0.79 | 1.37 | 2.44 | 3.24 | −0.41 | 0.44 | 0.9 | 1.87 | 2.56 | −0.89 | 0.07 | 0.65 | 1.89 | 4.18 | −0.25 | 0.64 | 1.19 | 2.15 | 4.17 | −0.35 | 0.49 | 1.02 | 2.08 |
| de Medeiros 37 | 2021 | 1.71 | −2.73 | −1.84 | −.72 | 0.25 | 1.93 | −2.56 | −1.48 | −.64 | 0.31 | 2.72 | −.50 | 0.01 | 0.5 | 1.09 | 1.84 | −.02 | 0.77 | 1.47 | 2.04 | 2.07 | −1.72 | −1.12 | −.45 | 0.13 | 2.27 | −1.46 | −.84 | −.14 | 0.64 | 2.35 | −.32 | 0.39 | 1 | 1.74 |
| Bellamkonda 40 | 2021 | −.33 | −2.41 | −2.83 | −3.17 | −1.33 | −.41 | −2.49 | −2.98 | −3.40 | −1.64 | 0.42 | −1.66 | −1.33 | −.92 | 1.68 | 0.49 | −1.59 | −1.19 | −.71 | 1.96 | .03 | −2.05 | −2.11 | −2.09 | 0.11 | 1.28 | −.80 | 0.39 | 1.65 | 5.1 | 0.91 | −1.17 | −.34 | 0.56 | 3.65 |
| Elemo 42 | 2020 | 1.06 | − 5.21 | − 2.73 | − 2.19 | 0.36 | 1.09 | − 3.77 | − 2.16 | − 1.54 | 0.67 | 2.98 | − .69 | 0.3 | 1.36 | 2.39 | 1.92 | − 1.57 | − .20 | 0.64 | 1.93 | 2.08 | − 1.73 | − .52 | 0.1 | 1.45 | 5.11 | − .52 | 0.29 | 1.28 | 2.14 | 3.21 | − .84 | 0.07 | 0.89 | 2.01 |
| Caycho-Rodr ıguez 43 | 2020 | 2.78 | –0.69 | 0.01 | 0.76 | 1.54 | 1.42 | –0.89 | 0 | 0.8 | 1.75 | 1.98 | 1.19 | 1.86 | 2.51 | 2.93 | 2.08 | 0.39 | 1.06 | 1.61 | 2.13 | 1.82 | -0.24 | 0.51 | 1.14 | 1.97 | 3.26 | 1.01 | 1.55 | 2.05 | 2.57 | 2.99 | 0.71 | 1.28 | 1.69 | 2.22 |
| Satici 44 | 2020 | 1.78 | − 2.54 | − 1.08 | − .22 | 1.53 | 1.95 | −2.26 | − 1.07 | − .63 | 1.15 | 1.51 | − .27 | 1.59 | 2.31 | 3.52 | 1.87 | − 1.52 | − .42 | 0.16 | 1.64 | 2.09 | − 2.27 | − 1.15 | − .64 | 1.08 | 2.12 | − .47 | 0.96 | 1.51 | 2.72 | 2.03 | − .91 | 0.41 | 0.93 | 2.41 |
| Stănculescu 50 | 2021 | 2.22 | − 0.98 | − 0.11 | 1.02 | 1.95 | 1.88 | − 1.17 | − 0.26 | 0.60 | 1.59 | 3.34 | − 0.20 | 0.79 | 1.65 | 2.20 | 2.67 | 0.28 | 1.01 | 1.89 | 2.50 | 2.39 | − 0.59 | 0.30 | 1.06 | 2.02 | 3.59 | 0.78 | 1.33 | 2.08 | 2.60 | 3.31 | 0.61 | 1.15 | 1.87 | 2.68 |
| Minimum | | 1.06 | − 5.21 | 0.01 | 0.55 | 0.25 | 1.09 | − 3.77 | 0 | 0.18 | 0.31 | 0.42 | 1.19 | 0.01 | 0.5 | 1.09 | 0.49 | 0.28 | 0.44 | 0.16 | 1.64 | 0.03 | -0.24 | 0.07 | 0.1 | 0.11 | 1.28 | 0.78 | 0.29 | 1.19 | 0.64 | 0.91 | 0.61 | 0.07 | 0.56 | 1.74 |
| Maximum | | 2.78 | –0.69 | 0.01 | 1.02 | 1.95 | 1.95 | –0.89 | 0 | 0.8 | 2.13 | 3.34 | 1.19 | 1.86 | 2.51 | 3.52 | 3.24 | 0.39 | 1.06 | 1.89 | 2.5 | 2.56 | -0.24 | 0.51 | 1.14 | 2.02 | 5.11 | 1.01 | 1.55 | 2.08 | 5.1 | 4.17 | 0.71 | 1.28 | 1.87 | 3.65 |
